# Supplementary material for: Mitochondrial metabolism sustains CD8+ T cell migration for an efficient infiltration into solid tumors
Source: PubMed Central journal article supplement (PMC10928223; doi:10.1038/s41467-024-46377-7), 2024-03-11
Supplement: 41467_2024_46377_MOESM3_ESM.pdf [file 41467_2024_46377_MOESM3_ESM.pdf]

## Description of Additional Supplementary Files

**Supplementary Movies 1-58.** This zip archive contains 58 movies of the 3D migration experiments shown in the main figures (2D z-stack reconstruction, 3 fps).
